# Supplementary material for: Simultaneous quantification of microplastic particles by non-deuterated (NoD) 1H-qNMR from samples comprising different polymer types
Source: Royal Society of Chemistry journal article supplement (doi:10.1039/d2an01751b), 2023-01-01
Supplement: d2an01751b1.pdf [file d2an01751b1.pdf]

## Supporting Information: Simultaneous quantification of microplastic particles by NoD $^1\text{H}$ -qNMR comprising samples of different polymer types

Marcel Günther, Wolfgang Imhof

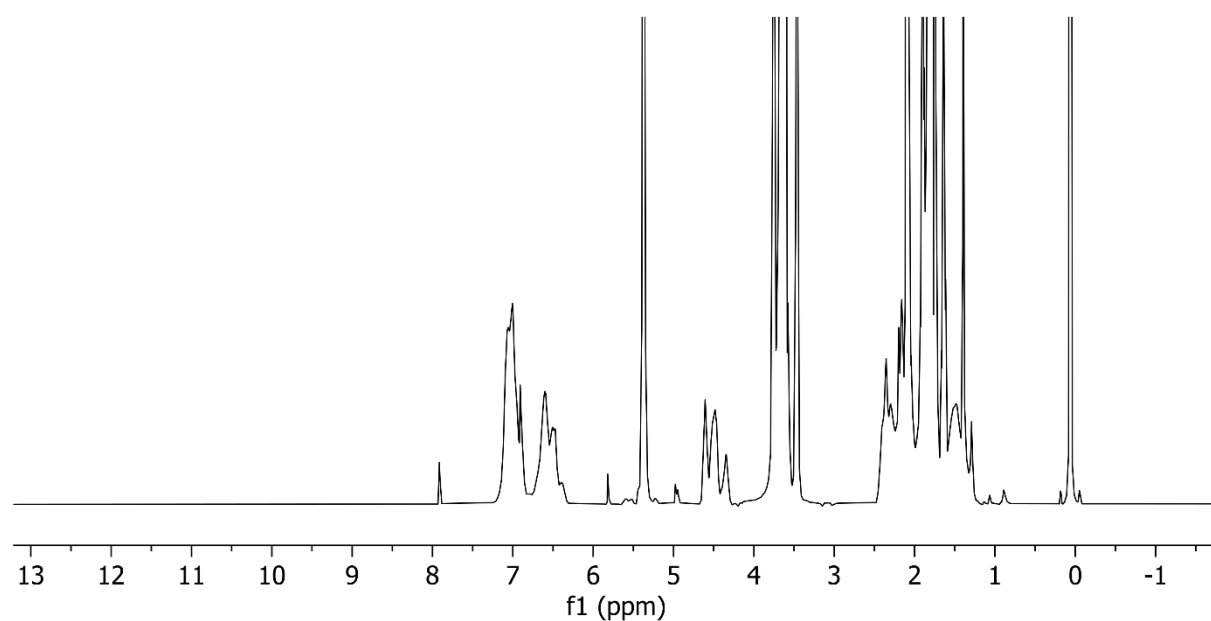

Figure S1:  $^1\text{H}$ -NMR spectra of PS, BR and PVC measured in non-deuterated THF using HMDSO as INST.

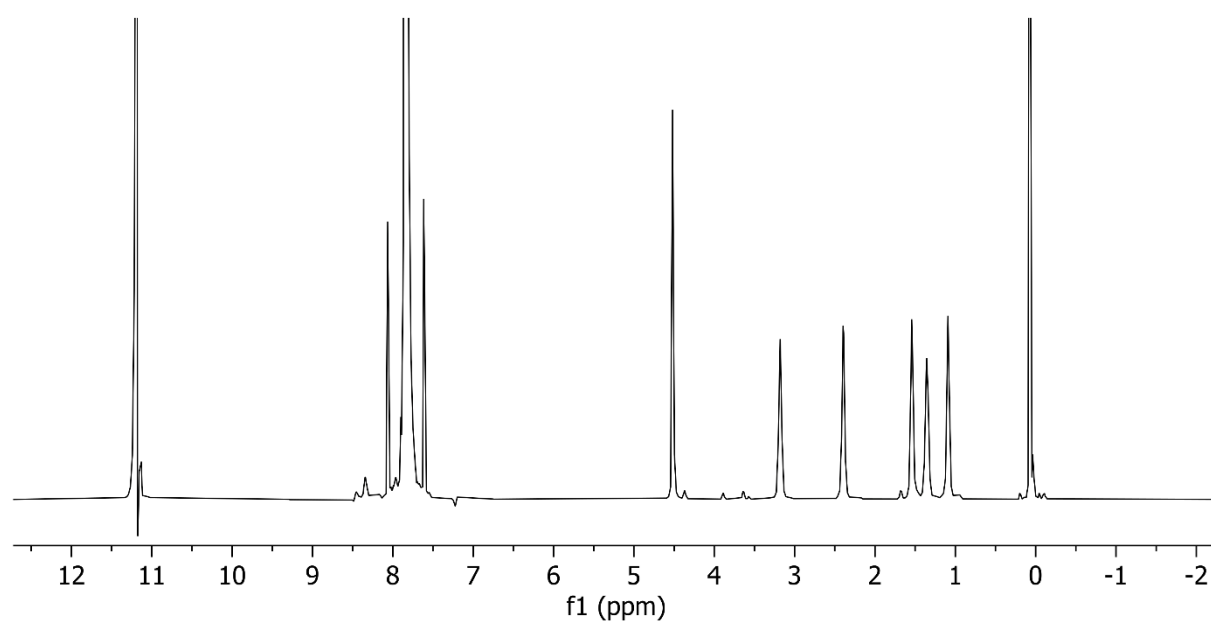

Figure S2:  $^1\text{H}$ -NMR spectra of PET and PA measured in non-deuterated TFA/FA (85:15 Vol.-%) using HMDSO as INST.

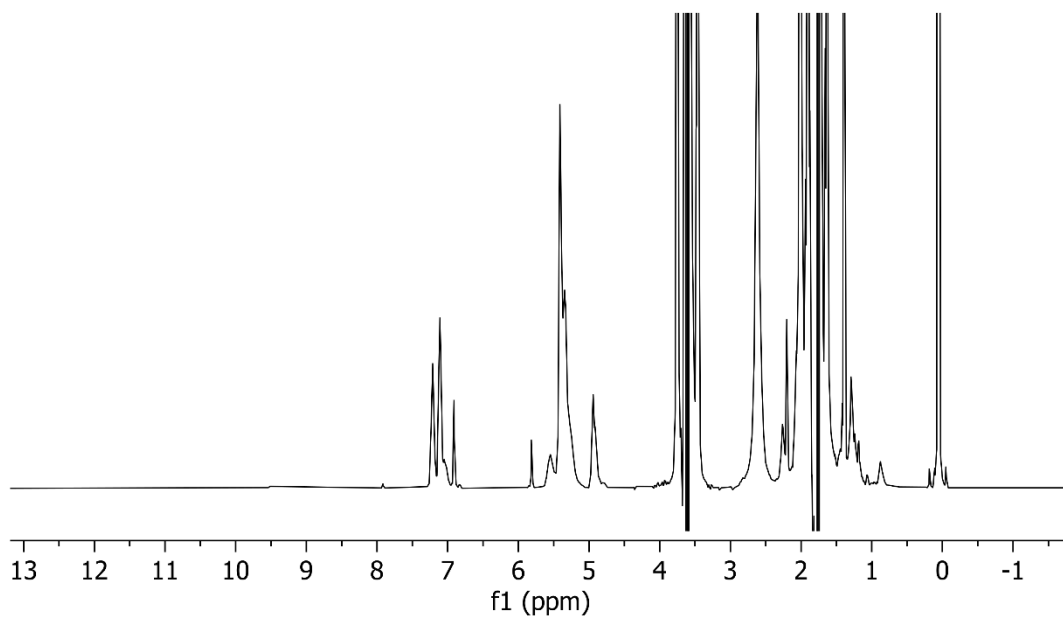

Figure S3: <sup>1</sup>H-NMR spectra of SBR measured in non-deuterated THF using HMDSO as INST.

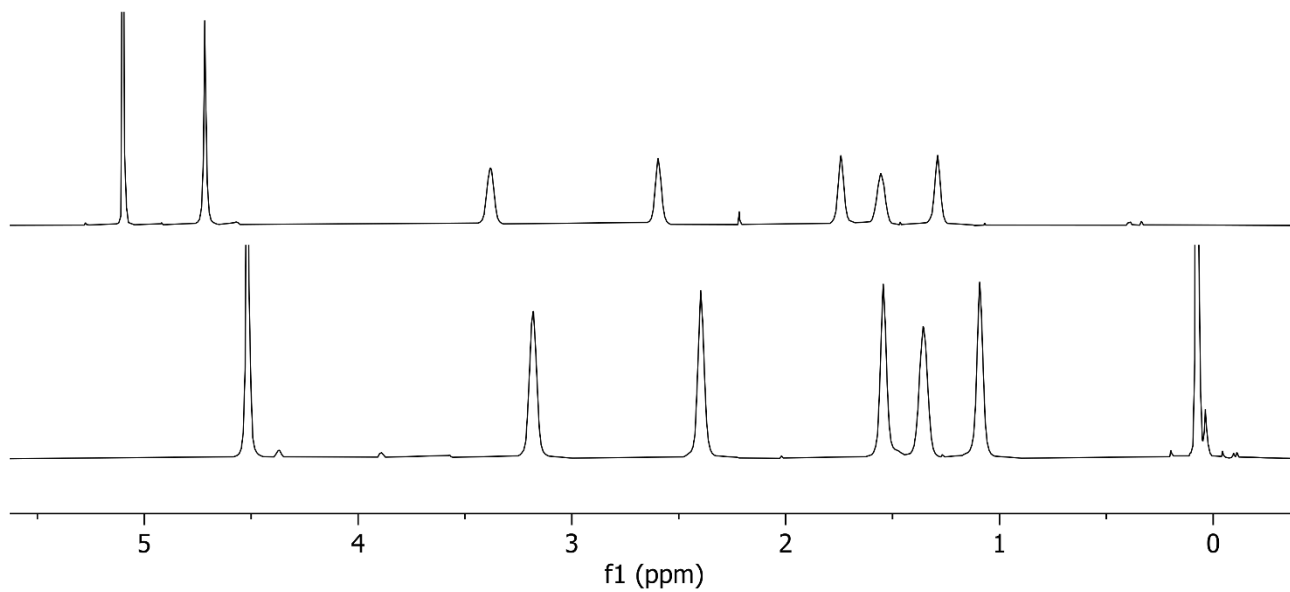

Figure S4: Comparison of PET and PA measured by <sup>1</sup>H-NMR in TFA/FA (85:15 Vol.-%) either using DCM (top) or HMDSO (bottom) as INST.

Table S1: Intensities of PVC, BR and PS calibration samples within the range of 2.5-0.5 mg/mL measured by <sup>1</sup>H-NMR simultaneously dissolved in non-deuterated THF using HMDSO as INST (0.1%). Each sample is measured three repetitive times within one day.

| Sample |   | Concentration [mg/mL] |      |      | INST   | Absolute Intensity |        |        | Normalised Intensity |      |      |
|--------|---|-----------------------|------|------|--------|--------------------|--------|--------|----------------------|------|------|
|        |   | PVC                   | BR   | PS   |        | PVC                | BR     | PS     | PVC                  | BR   | PS   |
| K1     | 1 |                       |      |      | 1.7457 | 0.8125             | 1.8558 | 2.6204 |                      |      |      |
|        | 2 | 2.51                  | 2.49 | 2.51 | 5.4027 | 2.4740             | 5.7077 | 8.0638 | 1.37                 | 3.13 | 4.43 |
|        | 3 |                       |      |      | 1.7224 | 0.7996             | 1.8269 | 2.5767 |                      |      |      |
| K2     | 1 |                       |      |      | 5.4720 | 2.0447             | 4.6595 | 6.6445 |                      |      |      |
|        | 2 | 2.00                  | 1.99 | 2.01 | 5.4606 | 2.0078             | 4.6247 | 6.5628 | 1.10                 | 2.51 | 3.57 |
|        | 3 |                       |      |      | 5.5087 | 2.0530             | 4.6697 | 6.6210 |                      |      |      |
| K3     | 1 |                       |      |      | 5.4817 | 1.5422             | 3.5277 | 5.0463 |                      |      |      |
|        | 2 | 1.50                  | 1.49 | 1.51 | 5.5121 | 1.5580             | 3.5321 | 5.0376 | 0.83                 | 1.90 | 2.71 |
|        | 3 |                       |      |      | 5.4968 | 1.5218             | 3.5137 | 5.0155 |                      |      |      |
| K4     | 1 |                       |      |      | 5.5273 | 1.0318             | 2.3836 | 3.4654 |                      |      |      |
|        | 2 | 1.00                  | 1.00 | 1.00 | 5.5345 | 1.0114             | 2.3724 | 3.4492 | 0.54                 | 1.27 | 1.84 |
|        | 3 |                       |      |      | 1.7483 | 0.3140             | 0.7503 | 1.0839 |                      |      |      |
| K5     | 1 |                       |      |      | 5.5284 | 0.4820             | 1.1022 | 1.7069 |                      |      |      |
|        | 2 | 0.50                  | 0.50 | 0.50 | 5.5236 | 0.4638             | 1.0909 | 1.6869 | 0.25                 | 0.58 | 0.91 |
|        | 3 |                       |      |      | 5.4148 | 0.4642             | 1.0623 | 1.6475 |                      |      |      |

Table S2: Intensities of PVC, BR and PS calibration samples within the range of 0.5-0.1 mg/mL measured by <sup>1</sup>H-NMR simultaneously dissolved in non-deuterated THF using HMDSO as INST (0.1%). Each sample is measured three repetitive times within one day.

| Sample |   | Concentration [mg/mL] |      |      | INST   | Absolute Intensity |        |        | Normalised Intensity |      |      |
|--------|---|-----------------------|------|------|--------|--------------------|--------|--------|----------------------|------|------|
|        |   | PVC                   | BR   | PS   |        | PVC                | BR     | PS     | PVC                  | BR   | PS   |
| K1     | 1 |                       |      |      | 6.1380 | 0.4321             | 1.1042 | 1.6610 |                      |      |      |
|        | 2 | 0.50                  | 0.51 | 0.49 | 6.3363 | 0.4839             | 1.1455 | 1.7382 | 0.47                 | 1.13 | 1.71 |
|        | 3 |                       |      |      | 6.3363 | 0.4828             | 1.1448 | 1.7241 |                      |      |      |
| K2     | 1 |                       |      |      | 6.2789 | 0.3495             | 0.8843 | 1.4024 |                      |      |      |
|        | 2 | 0.40                  | 0.40 | 0.40 | 6.3066 | 0.3902             | 0.9160 | 1.4245 | 0.37                 | 0.90 | 1.41 |
|        | 3 |                       |      |      | 6.3773 | 0.3904             | 0.9228 | 1.4452 |                      |      |      |
| K3     | 1 |                       |      |      | 6.2336 | 0.2580             | 0.6837 | 1.0883 |                      |      |      |
|        | 2 | 0.30                  | 0.30 | 0.30 | 6.2462 | 0.2925             | 0.6785 | 1.0928 | 0.28                 | 0.69 | 1.09 |
|        | 3 |                       |      |      | 6.3244 | 0.3023             | 0.6957 | 1.0825 |                      |      |      |
| K4     | 1 |                       |      |      | 6.4252 | 0.1606             | 0.4666 | 0.8219 |                      |      |      |
|        | 2 | 0.20                  | 0.20 | 0.20 | 6.3395 | 0.2089             | 0.4664 | 0.8267 | 0.18                 | 0.46 | 0.81 |
|        | 3 |                       |      |      | 6.4322 | 0.1942             | 0.4804 | 0.8376 |                      |      |      |
| K5     | 1 |                       |      |      | 6.4583 | 0.1036             | 0.2368 | 0.5216 |                      |      |      |
|        | 2 | 0.10                  | 0.10 | 0.10 | 6.4775 | 0.1093             | 0.2528 | 0.5281 | 0.10                 | 0.24 | 0.51 |
|        | 3 |                       |      |      | 6.4788 | 0.1029             | 0.2435 | 0.5186 |                      |      |      |

Table S3: Intensities of PA and PET calibration samples within the range of 2.5-0.5 mg/mL measured by <sup>1</sup>H-NMR simultaneously dissolved in non-deuterated TFA/FA (85:15 Vol.-%) using HMDSO as INST (0.1%). Each sample is measured three repetitive times within one day.

| Sample | Concentration [mg/mL] |      |      | Absolute Intensity |                 |                 |        | Normalised Intensity |                 |                 |      |      |
|--------|-----------------------|------|------|--------------------|-----------------|-----------------|--------|----------------------|-----------------|-----------------|------|------|
|        | PA                    | PET  | INST | PA <sub>1</sub>    | PA <sub>2</sub> | PA <sub>3</sub> | PET    | PA <sub>1</sub>      | PA <sub>2</sub> | PA <sub>3</sub> | PET  |      |
| K1     | 1                     |      |      | 1.8569             | 2.7662          | 0.9128          | 0.9025 | 1.1196               |                 |                 |      |      |
|        | 2                     | 2.50 | 2.50 | 1.8622             | 2.7686          | 0.9166          | 0.9034 | 1.1111               | 2.77            | 0.92            | 0.90 | 1.12 |
|        | 3                     |      |      | 1.8603             | 2.7690          | 0.9165          | 0.8997 | 1.1166               |                 |                 |      |      |
| K2     | 1                     |      |      | 1.8421             | 2.2088          | 0.7314          | 0.7200 | 0.8930               |                 |                 |      |      |
|        | 2                     | 2.00 | 2.00 | 1.8467             | 2.2094          | 0.7300          | 0.7206 | 0.8929               | 2.23            | 0.74            | 0.73 | 0.90 |
|        | 3                     |      |      | 1.8380             | 2.2012          | 0.7319          | 0.7155 | 0.8854               |                 |                 |      |      |
| K3     | 1                     |      |      | 1.8522             | 1.6775          | 0.5495          | 0.5475 | 0.6690               |                 |                 |      |      |
|        | 2                     | 1.50 | 1.50 | 1.8425             | 1.6699          | 0.5441          | 0.5406 | 0.6683               | 1.68            | 0.55            | 0.55 | 0.67 |
|        | 3                     |      |      | 1.8465             | 1.6710          | 0.5508          | 0.5436 | 0.6714               |                 |                 |      |      |
| K4     | 1                     |      |      | 1.8953             | 1.1685          | 0.3864          | 0.3787 | 0.4680               |                 |                 |      |      |
|        | 2                     | 1.00 | 1.00 | 1.8977             | 1.1633          | 0.3842          | 0.3784 | 0.4684               | 1.14            | 0.38            | 0.37 | 0.46 |
|        | 3                     |      |      | 1.9001             | 1.1696          | 0.3807          | 0.3785 | 0.4614               |                 |                 |      |      |
| K5     | 1                     |      |      | 1.8667             | 0.5839          | 0.1898          | 0.1911 | 0.2327               |                 |                 |      |      |
|        | 2                     | 0.50 | 0.50 | 1.8560             | 0.5907          | 0.1936          | 0.1939 | 0.2302               | 0.59            | 0.19            | 0.19 | 0.23 |
|        | 3                     |      |      | 1.8647             | 0.5837          | 0.1875          | 0.1900 | 0.2236               |                 |                 |      |      |

Table S4: Intensities of PA and PET calibration samples within the range of 0.5-0.1 mg/mL measured by <sup>1</sup>H-NMR simultaneously dissolved in non-deuterated TFA/FA (85:15 Vol.-%) using HMDSO as INST (0.1%). Each sample is measured three repetitive times within one day.

| Sample | Concentration [mg/mL] |      |      | Absolute Intensity |                 |                 |        | Normalised Intensity |                 |                 |      |      |
|--------|-----------------------|------|------|--------------------|-----------------|-----------------|--------|----------------------|-----------------|-----------------|------|------|
|        | PA                    | PET  | INST | PA <sub>1</sub>    | PA <sub>2</sub> | PA <sub>3</sub> | PET    | PA <sub>1</sub>      | PA <sub>2</sub> | PA <sub>3</sub> | PET  |      |
| K1     | 1                     |      |      | 1.8646             | 0.5525          | 0.1898          | 0.1838 | 0.2293               |                 |                 |      |      |
|        | 2                     | 0.50 | 0.50 | 1.8843             | 0.5666          | 0.1824          | 0.1854 | 0.2268               | 0.56            | 0.19            | 0.18 | 0.23 |
|        | 3                     |      |      | 1.8748             | 0.5502          | 0.1839          | 0.1833 | 0.2235               |                 |                 |      |      |
| K2     | 1                     |      |      | 1.8296             | 0.4454          | 0.1467          | 0.1418 | 0.1780               |                 |                 |      |      |
|        | 2                     | 0.40 | 0.40 | 1.8517             | 0.4510          | 0.1461          | 0.1483 | 0.1824               | 0.46            | 0.15            | 0.15 | 0.18 |
|        | 3                     |      |      | 1.8233             | 0.4444          | 0.1462          | 0.1437 | 0.1759               |                 |                 |      |      |
| K3     | 1                     |      |      | 1.8188             | 0.3376          | 0.1100          | 0.1090 | 0.1346               |                 |                 |      |      |
|        | 2                     | 0.30 | 0.30 | 1.8476             | 0.3360          | 0.1105          | 0.1177 | 0.1516               | 0.35            | 0.11            | 0.12 | 0.15 |
|        | 3                     |      |      | 1.8334             | 0.3408          | 0.1115          | 0.1113 | 0.1395               |                 |                 |      |      |
| K4     | 1                     |      |      | 1.8752             | 0.2343          | 0.0696          | 0.0782 | 0.0957               |                 |                 |      |      |
|        | 2                     | 0.20 | 0.20 | 1.8768             | 0.2499          | 0.0850          | 0.0774 | 0.0957               | 0.24            | 0.08            | 0.08 | 0.09 |
|        | 3                     |      |      | 1.8643             | 0.2335          | 0.0785          | 0.0770 | 0.0850               |                 |                 |      |      |
| K5     | 1                     |      |      | 1.8966             | 0.1260          | 0.0425          | 0.0391 | 0.0536               |                 |                 |      |      |
|        | 2                     | 0.10 | 0.10 | 1.8917             | 0.1246          | 0.0310          | 0.0378 | 0.0485               | 0.12            | 0.04            | 0.04 | 0.05 |
|        | 3                     |      |      | 1.8842             | 0.1273          | 0.0411          | 0.0419 | 0.0481               |                 |                 |      |      |

Table S5: Intensities of PVC, BR and PS model samples within the range of 2.5-0.5 mg/mL measured by <sup>1</sup>H-NMR in non-deuterated THF using HMDSO as INST (0.1%). Each sample is measured five times distributed over five hours.

| Sample | t [h] | Concentration [mg/mL] |      |      | INST   | Absolute Intensity |        |        | Normalised Intensity |      |      |
|--------|-------|-----------------------|------|------|--------|--------------------|--------|--------|----------------------|------|------|
|        |       | PVC                   | BR   | PS   |        | PVC                | BR     | PS     | PVC                  | BR   | PS   |
| M1     | 0     |                       |      |      | 1.9420 | 0.5172             | 1.8242 | 0.8938 | 0.79                 | 2.78 | 1.36 |
|        | 1     |                       |      |      | 6.0715 | 1.5842             | 5.7108 | 2.7963 | 0.77                 | 2.78 | 1.36 |
|        | 2     | 1.38                  | 2.17 | 0.75 | 5.9471 | 1.5627             | 5.5810 | 2.7407 | 0.78                 | 2.77 | 1.36 |
|        | 3     |                       |      |      | 6.0940 | 1.5996             | 5.6973 | 2.7990 | 0.78                 | 2.76 | 1.36 |
|        | 4     |                       |      |      | 6.0652 | 1.6115             | 5.6969 | 2.7801 | 0.79                 | 2.78 | 1.36 |
| M2     | 0     |                       |      |      | 5.4153 | 0.5355             | 3.1433 | 7.3554 | 0.29                 | 1.72 | 4.02 |
|        | 1     |                       |      |      | 5.3968 | 0.5348             | 3.1253 | 7.3253 | 0.29                 | 1.71 | 4.01 |
|        | 2     | 0.65                  | 1.34 | 2.20 | 5.3733 | 0.5366             | 3.1202 | 7.2809 | 0.30                 | 1.72 | 4.01 |
|        | 3     |                       |      |      | 5.3978 | 0.5347             | 3.1348 | 7.3150 | 0.29                 | 1.72 | 4.01 |
|        | 4     |                       |      |      | 5.4076 | 0.5447             | 3.1342 | 7.3058 | 0.30                 | 1.71 | 3.99 |
| M3     | 0     |                       |      |      | 5.3889 | 2.3490             | 1.7330 | 5.5672 | 1.29                 | 0.95 | 3.05 |
|        | 1     |                       |      |      | 5.3526 | 2.3284             | 1.7255 | 5.5001 | 1.29                 | 0.95 | 3.04 |
|        | 2     | 2.37                  | 0.76 | 1.73 | 5.3218 | 2.3138             | 1.7122 | 5.4585 | 1.29                 | 0.95 | 3.03 |
|        | 3     |                       |      |      | 5.3191 | 2.3443             | 1.7091 | 5.4561 | 1.30                 | 0.95 | 3.03 |
|        | 4     |                       |      |      | 5.3715 | 2.3303             | 1.7313 | 5.5172 | 1.28                 | 0.95 | 3.04 |

Table S6: Intensities of PVC, BR and PS model samples within the range of 2.5-0.5 mg/mL measured by <sup>1</sup>H-NMR in non-deuterated THF using HMDSO as INST (0.1%). Each sample is measured five times distributed over one week.

| Sample | t [d] | Concentration [mg/mL] |      |      | INST   | Absolute Intensity |        |        | Normalised Intensity |      |      |
|--------|-------|-----------------------|------|------|--------|--------------------|--------|--------|----------------------|------|------|
|        |       | PVC                   | BR   | PS   |        | PVC                | BR     | PS     | PVC                  | BR   | PS   |
| M1     | 0     |                       |      |      | 6.1132 | 1.5786             | 5.7489 | 2.8137 | 0.76                 | 2.78 | 1.36 |
|        | 1     |                       |      |      | 6.1255 | 1.5704             | 5.7330 | 2.8086 | 0.76                 | 2.77 | 1.36 |
|        | 2     | 1.38                  | 2.17 | 0.75 | 1.9441 | 0.5128             | 1.8225 | 0.8929 | 0.78                 | 2.77 | 1.36 |
|        | 3     |                       |      |      | 6.0919 | 1.5358             | 5.7004 | 2.7939 | 0.75                 | 2.77 | 1.36 |
|        | 4     |                       |      |      | 1.9388 | 0.4922             | 1.8223 | 0.8890 | 0.75                 | 2.78 | 1.36 |
| M2     | 0     |                       |      |      | 5.3885 | 0.5521             | 3.1463 | 7.3826 | 0.30                 | 1.73 | 4.05 |
|        | 1     |                       |      |      | 1.7227 | 0.1659             | 1.0006 | 2.3401 | 0.28                 | 1.72 | 4.02 |
|        | 2     | 0.65                  | 1.34 | 2.20 | 5.4258 | 0.5410             | 3.1372 | 7.3616 | 0.29                 | 1.71 | 4.01 |
|        | 3     |                       |      |      | 5.4653 | 0.5831             | 3.1774 | 7.3838 | 0.32                 | 1.72 | 3.99 |
|        | 4     |                       |      |      | 1.7253 | 0.1847             | 0.9964 | 2.3115 | 0.32                 | 1.71 | 3.96 |
| M3     | 0     |                       |      |      | 5.3218 | 2.3625             | 1.7254 | 5.5141 | 1.31                 | 0.96 | 3.06 |
|        | 1     |                       |      |      | 1.7057 | 0.7357             | 0.5508 | 1.7625 | 1.28                 | 0.95 | 3.06 |
|        | 2     | 2.37                  | 0.76 | 1.73 | 5.3921 | 2.3509             | 1.7282 | 5.5929 | 1.29                 | 0.95 | 3.07 |
|        | 3     |                       |      |      | 5.4003 | 2.2871             | 1.7535 | 5.5287 | 1.25                 | 0.96 | 3.03 |
|        | 4     |                       |      |      | 5.3630 | 2.3040             | 1.7225 | 5.5246 | 1.27                 | 0.95 | 3.05 |

Table S7: Intensities of PVC, BR and PS model samples within the range of 0.5-0.1 mg/mL measured by <sup>1</sup>H-NMR in non-deuterated THF using HMDSO as INST (0.1%). Each sample is measured five times distributed over five hours.

| Sample | t [h] | Concentration [mg/mL] |      |      | INST   | Absolute Intensity |        |        | Normalised Intensity |      |      |
|--------|-------|-----------------------|------|------|--------|--------------------|--------|--------|----------------------|------|------|
|        |       | PVC                   | BR   | PS   |        | PVC                | BR     | PS     | PVC                  | BR   | PS   |
| M1     | 0     |                       |      |      | 6.4495 | 0.1701             | 0.9927 | 1.0101 | 0.17                 | 0.97 | 0.98 |
|        | 1     |                       |      |      | 6.3522 | 0.1357             | 0.9747 | 0.9929 | 0.13                 | 0.96 | 0.98 |
|        | 2     | 0.17                  | 0.43 | 0.27 | 6.3797 | 0.1735             | 1.0004 | 1.0173 | 0.17                 | 0.98 | 1.00 |
|        | 3     |                       |      |      | 6.3600 | 0.1376             | 0.9811 | 0.9824 | 0.14                 | 0.97 | 0.97 |
|        | 4     |                       |      |      | 6.4062 | 0.1534             | 0.9940 | 1.0218 | 0.15                 | 0.97 | 1.00 |
| M2     | 0     |                       |      |      | 6.2975 | 0.2737             | 0.5374 | 1.7692 | 0.27                 | 0.54 | 1.76 |
|        | 1     |                       |      |      | 6.2351 | 0.2540             | 0.5436 | 1.7598 | 0.26                 | 0.55 | 1.77 |
|        | 2     | 0.26                  | 0.24 | 0.49 | 6.3078 | 0.2483             | 0.5486 | 1.7719 | 0.25                 | 0.55 | 1.76 |
|        | 3     |                       |      |      | 6.3024 | 0.2620             | 0.5475 | 1.7574 | 0.26                 | 0.54 | 1.75 |
|        | 4     |                       |      |      | 6.2435 | 0.2421             | 0.5472 | 1.7652 | 0.24                 | 0.55 | 1.77 |
| M3     | 0     |                       |      |      | 6.1761 | 0.4066             | 0.3224 | 1.3146 | 0.41                 | 0.33 | 1.33 |
|        | 1     |                       |      |      | 6.1360 | 0.4159             | 0.3311 | 1.3061 | 0.42                 | 0.34 | 1.33 |
|        | 2     | 0.43                  | 0.17 | 0.36 | 6.1673 | 0.4069             | 0.3346 | 1.2942 | 0.41                 | 0.34 | 1.32 |
|        | 3     |                       |      |      | 1.9334 | 0.1203             | 0.1017 | 0.4108 | 0.39                 | 0.33 | 1.33 |
|        | 4     |                       |      |      | 6.0950 | 0.4054             | 0.3166 | 1.3048 | 0.42                 | 0.33 | 1.34 |

Table S8: Intensities of PVC, BR and PS model samples within the range of 0.5-0.1 mg/mL measured by <sup>1</sup>H-NMR in non-deuterated THF using HMDSO as INST (0.1%). Each sample is measured five times distributed over one week.

| Sample | t [d] | Concentration [mg/mL] |      |      | INST   | Absolute Intensity |        |        | Normalised Intensity |      |      |
|--------|-------|-----------------------|------|------|--------|--------------------|--------|--------|----------------------|------|------|
|        |       | PVC                   | BR   | PS   |        | PVC                | BR     | PS     | PVC                  | BR   | PS   |
| M1     | 0     |                       |      |      | 6.2759 | 0.1560             | 0.9619 | 1.0051 | 0.16                 | 0.96 | 1.00 |
|        | 1     |                       |      |      | 6.3663 | 0.1471             | 0.9719 | 1.0035 | 0.14                 | 0.96 | 0.99 |
|        | 2     | 0.17                  | 0.43 | 0.27 | 6.4439 | 0.1521             | 0.9921 | 1.0161 | 0.15                 | 0.97 | 0.99 |
|        | 3     |                       |      |      | 6.4630 | 0.1441             | 0.9950 | 1.0197 | 0.14                 | 0.97 | 0.99 |
|        | 4     |                       |      |      | 2.0543 | 0.0496             | 0.3192 | 0.3231 | 0.15                 | 0.97 | 0.99 |
| M2     | 0     |                       |      |      | 6.2413 | 0.2510             | 0.5374 | 1.7634 | 0.25                 | 0.54 | 1.77 |
|        | 1     |                       |      |      | 6.2975 | 0.2629             | 0.5417 | 1.7713 | 0.26                 | 0.54 | 1.76 |
|        | 2     | 0.26                  | 0.24 | 0.49 | 6.3063 | 0.2716             | 0.5243 | 1.7585 | 0.27                 | 0.52 | 1.75 |
|        | 3     |                       |      |      | 2.0045 | 0.0885             | 0.1778 | 0.5564 | 0.28                 | 0.56 | 1.74 |
|        | 4     |                       |      |      | 2.0028 | 0.0725             | 0.1730 | 0.5635 | 0.23                 | 0.54 | 1.76 |
| M3     | 0     |                       |      |      | 6.1892 | 0.4104             | 0.3216 | 1.3019 | 0.42                 | 0.33 | 1.32 |
|        | 1     |                       |      |      | 6.1816 | 0.3979             | 0.3144 | 1.3143 | 0.40                 | 0.32 | 1.33 |
|        | 2     | 0.43                  | 0.17 | 0.36 | 6.1785 | 0.4063             | 0.3223 | 1.3163 | 0.41                 | 0.33 | 1.34 |
|        | 3     |                       |      |      | 6.2086 | 0.4180             | 0.3261 | 1.3324 | 0.42                 | 0.33 | 1.35 |
|        | 4     |                       |      |      | 6.1552 | 0.4184             | 0.3346 | 1.3072 | 0.43                 | 0.34 | 1.33 |

Table S9: Intensities of PA and PET model samples within the range of 2.5-0.5 mg/mL measured by <sup>1</sup>H-NMR in non-deuterated TFA/FA (85:15 Vol.-%) using HMDSO as INST (0.1%). Each sample is measured five times distributed over five hours.

| Sample | t [h] | Concentration [mg/mL] |      | INST   | Absolute Intensity |                 |                 | PET    | Normalised Intensity |                 |                 |      |
|--------|-------|-----------------------|------|--------|--------------------|-----------------|-----------------|--------|----------------------|-----------------|-----------------|------|
|        |       | PA                    | PET  |        | PA <sub>1</sub>    | PA <sub>2</sub> | PA <sub>3</sub> |        | PA <sub>1</sub>      | PA <sub>2</sub> | PA <sub>3</sub> | PET  |
| M1     | 0     |                       |      | 1.9080 | 0.7610             | 0.2465          | 0.2437          | 1.0470 | 0.74                 | 0.24            | 0.24            | 1.02 |
|        | 1     |                       |      | 1.9015 | 0.7616             | 0.2478          | 0.2443          | 1.0555 | 0.74                 | 0.24            | 0.24            | 1.03 |
|        | 2     | 0.65                  | 2.30 | 1.9001 | 0.7604             | 0.2483          | 0.2422          | 1.0428 | 0.74                 | 0.24            | 0.24            | 1.02 |
|        | 3     |                       |      | 1.9002 | 0.7543             | 0.2485          | 0.2412          | 1.0488 | 0.74                 | 0.24            | 0.24            | 1.03 |
|        | 4     |                       |      | 1.8904 | 0.7558             | 0.2468          | 0.2443          | 1.0383 | 0.74                 | 0.24            | 0.24            | 1.02 |
| M2     | 0     |                       |      | 1.8069 | 2.4578             | 0.8210          | 0.8029          | 0.6599 | 2.53                 | 0.85            | 0.83            | 0.68 |
|        | 1     |                       |      | 1.7992 | 2.4467             | 0.8112          | 0.8020          | 0.6520 | 2.53                 | 0.84            | 0.83            | 0.67 |
|        | 2     | 2.27                  | 1.50 | 1.8003 | 2.4587             | 0.8205          | 0.8062          | 0.6597 | 2.54                 | 0.85            | 0.83            | 0.68 |
|        | 3     |                       |      | 1.8123 | 2.4703             | 0.8206          | 0.8082          | 0.6614 | 2.54                 | 0.84            | 0.83            | 0.68 |
|        | 4     |                       |      | 1.7963 | 2.4399             | 0.8085          | 0.7979          | 0.6558 | 2.53                 | 0.84            | 0.83            | 0.68 |
| M3     | 0     |                       |      | 1.8528 | 1.6435             | 0.5443          | 0.5343          | 0.3321 | 1.65                 | 0.55            | 0.54            | 0.33 |
|        | 1     |                       |      | 1.8388 | 1.6269             | 0.5396          | 0.5318          | 0.3256 | 1.65                 | 0.55            | 0.54            | 0.33 |
|        | 2     | 1.47                  | 0.69 | 1.8593 | 1.6456             | 0.5443          | 0.5356          | 0.3362 | 1.65                 | 0.54            | 0.54            | 0.34 |
|        | 3     |                       |      | 1.8459 | 1.6343             | 0.5438          | 0.5318          | 0.3241 | 1.65                 | 0.55            | 0.54            | 0.33 |
|        | 4     |                       |      | 1.8350 | 1.6202             | 0.5409          | 0.5284          | 0.3254 | 1.64                 | 0.55            | 0.54            | 0.33 |

Table S10: Intensities of PA and PET model samples within the range of 2.5-0.5 mg/mL measured by <sup>1</sup>H-NMR in non-deuterated TFA/FA (85:15 Vol.-%) using HMDSO as INST (0.1%). Each sample is measured five times distributed over one week.

| Sample | t [d] | Concentration [mg/mL] |      | INST   | Absolute Intensity |                 |                 | PET    | Normalised Intensity |                 |                 |      |
|--------|-------|-----------------------|------|--------|--------------------|-----------------|-----------------|--------|----------------------|-----------------|-----------------|------|
|        |       | PA                    | PET  |        | PA <sub>1</sub>    | PA <sub>2</sub> | PA <sub>3</sub> |        | PA <sub>1</sub>      | PA <sub>2</sub> | PA <sub>3</sub> | PET  |
| M1     | 0     |                       |      | 1.9028 | 0.7597             | 0.2477          | 0.2425          | 1.0479 | 0.74                 | 0.24            | 0.24            | 1.02 |
|        | 1     |                       |      | 1.9147 | 0.7656             | 0.2440          | 0.2464          | 1.0547 | 0.74                 | 0.24            | 0.24            | 1.02 |
|        | 2     | 0.65                  | 2.30 | 1.9041 | 0.7606             | 0.2473          | 0.2438          | 1.0483 | 0.74                 | 0.24            | 0.24            | 1.02 |
|        | 3     |                       |      | 1.9270 | 0.7701             | 0.2482          | 0.2481          | 1.0591 | 0.74                 | 0.24            | 0.24            | 1.02 |
|        | 4     |                       |      | 1.8992 | 0.7629             | 0.2478          | 0.2447          | 1.0503 | 0.75                 | 0.24            | 0.24            | 1.03 |
| M2     | 0     |                       |      | 1.8036 | 2.4541             | 0.8147          | 0.8029          | 0.6622 | 2.53                 | 0.84            | 0.83            | 0.68 |
|        | 1     |                       |      | 1.8092 | 2.4673             | 0.8262          | 0.8052          | 0.6631 | 2.54                 | 0.85            | 0.83            | 0.68 |
|        | 2     | 2.27                  | 1.50 | 1.8097 | 2.4570             | 0.8199          | 0.8028          | 0.6512 | 2.53                 | 0.84            | 0.83            | 0.67 |
|        | 3     |                       |      | 1.8239 | 2.4790             | 0.8228          | 0.8081          | 0.6643 | 2.53                 | 0.84            | 0.82            | 0.68 |
|        | 4     |                       |      | 1.7972 | 2.4349             | 0.8110          | 0.7984          | 0.6583 | 2.52                 | 0.84            | 0.83            | 0.68 |
| M3     | 0     |                       |      | 1.8529 | 1.6381             | 0.5436          | 0.5326          | 0.3344 | 1.64                 | 0.55            | 0.53            | 0.34 |
|        | 1     |                       |      | 1.8526 | 1.6383             | 0.5497          | 0.5358          | 0.3374 | 1.64                 | 0.55            | 0.54            | 0.34 |
|        | 2     | 1.47                  | 0.69 | 1.8591 | 1.6366             | 0.5399          | 0.5329          | 0.3405 | 1.64                 | 0.54            | 0.53            | 0.34 |
|        | 3     |                       |      | 1.8655 | 1.6530             | 0.5482          | 0.5414          | 0.3359 | 1.65                 | 0.55            | 0.54            | 0.33 |
|        | 4     |                       |      | 1.8440 | 1.6269             | 0.5342          | 0.5328          | 0.3285 | 1.64                 | 0.54            | 0.54            | 0.33 |

Table S11: Intensities of PA and PET model samples within the range of 0.5-0.1 mg/mL measured by <sup>1</sup>H-NMR in non-deuterated TFA/FA (85:15 Vol.-%) using HMDSO as INST (0.1%). Each sample is measured five times distributed over five hours.

| Sample | t [h] | Concentration [mg/mL] |      | INST   | Absolute Intensity |                 |                 | PET    | Normalised Intensity |                 |                 |      |
|--------|-------|-----------------------|------|--------|--------------------|-----------------|-----------------|--------|----------------------|-----------------|-----------------|------|
|        |       | PA                    | PET  |        | PA <sub>1</sub>    | PA <sub>2</sub> | PA <sub>3</sub> |        | PA <sub>1</sub>      | PA <sub>2</sub> | PA <sub>3</sub> | PET  |
| M1     | 0     |                       |      | 1.8468 | 0.3828             | 0.1242          | 0.1219          | 0.1845 | 0.39                 | 0.13            | 0.12            | 0.19 |
|        | 1     |                       |      | 1.8483 | 0.3872             | 0.1235          | 0.1231          | 0.1907 | 0.39                 | 0.13            | 0.12            | 0.19 |
|        | 2     | 0.34                  | 0.43 | 1.8745 | 0.3929             | 0.1261          | 0.1228          | 0.2024 | 0.39                 | 0.13            | 0.12            | 0.20 |
|        | 3     |                       |      | 1.8573 | 0.3872             | 0.1253          | 0.1251          | 0.1971 | 0.39                 | 0.13            | 0.13            | 0.20 |
|        | 4     |                       |      | 1.8517 | 0.3827             | 0.1248          | 0.1244          | 0.1921 | 0.39                 | 0.13            | 0.13            | 0.19 |
| M2     | 0     |                       |      | 1.8502 | 0.4660             | 0.1538          | 0.1530          | 0.1389 | 0.47                 | 0.16            | 0.16            | 0.14 |
|        | 1     |                       |      | 1.8405 | 0.4669             | 0.1461          | 0.1521          | 0.1452 | 0.48                 | 0.15            | 0.15            | 0.15 |
|        | 2     | 0.43                  | 0.32 | 1.8444 | 0.4595             | 0.1525          | 0.1497          | 0.1337 | 0.47                 | 0.15            | 0.15            | 0.14 |
|        | 3     |                       |      | 1.8563 | 0.4651             | 0.1538          | 0.1488          | 0.1500 | 0.47                 | 0.16            | 0.15            | 0.15 |
|        | 4     |                       |      | 1.8419 | 0.4626             | 0.1481          | 0.1501          | 0.1487 | 0.47                 | 0.15            | 0.15            | 0.15 |
| M3     | 0     |                       |      | 1.8744 | 0.2178             | 0.0705          | 0.0714          | 0.0864 | 0.22                 | 0.07            | 0.07            | 0.09 |
|        | 1     |                       |      | 1.8738 | 0.2206             | 0.0700          | 0.0712          | 0.0891 | 0.22                 | 0.07            | 0.07            | 0.09 |
|        | 2     | 0.20                  | 0.19 | 1.8762 | 0.2148             | 0.0728          | 0.0748          | 0.0811 | 0.21                 | 0.07            | 0.07            | 0.08 |
|        | 3     |                       |      | 1.8722 | 0.2184             | 0.0728          | 0.0699          | 0.0801 | 0.22                 | 0.07            | 0.07            | 0.08 |
|        | 4     |                       |      | 1.8684 | 0.2167             | 0.0725          | 0.0739          | 0.0901 | 0.22                 | 0.07            | 0.07            | 0.09 |

Table S12: Intensities of PA and PET model samples within the range of 0.5-0.1 mg/mL measured by <sup>1</sup>H-NMR in non-deuterated TFA/FA (85:15 Vol.-%) using HMDSO as INST (0.1%). Each sample is measured five times distributed over one week.

| Sample | t [d] | Concentration [mg/mL] |      | INST   | Absolute Intensity |                 |                 | PET    | Normalised Intensity |                 |                 |      |
|--------|-------|-----------------------|------|--------|--------------------|-----------------|-----------------|--------|----------------------|-----------------|-----------------|------|
|        |       | PA                    | PET  |        | PA <sub>1</sub>    | PA <sub>2</sub> | PA <sub>3</sub> |        | PA <sub>1</sub>      | PA <sub>2</sub> | PA <sub>3</sub> | PET  |
| M1     | 0     |                       |      | 1.8767 | 0.3905             | 0.1236          | 0.1269          | 0.1963 | 0.39                 | 0.12            | 0.13            | 0.20 |
|        | 1     |                       |      | 1.8660 | 0.3899             | 0.1301          | 0.1282          | 0.1934 | 0.39                 | 0.13            | 0.13            | 0.19 |
|        | 2     | 0.34                  | 0.43 | 1.8522 | 0.3857             | 0.1249          | 0.1216          | 0.1906 | 0.39                 | 0.13            | 0.12            | 0.19 |
|        | 3     |                       |      | 1.8652 | 0.3866             | 0.1254          | 0.1250          | 0.1910 | 0.39                 | 0.13            | 0.13            | 0.19 |
|        | 4     |                       |      | 1.8698 | 0.3888             | 0.1298          | 0.1272          | 0.1997 | 0.39                 | 0.13            | 0.13            | 0.20 |
| M2     | 0     |                       |      | 1.8568 | 0.4663             | 0.1590          | 0.1546          | 0.1464 | 0.47                 | 0.16            | 0.16            | 0.15 |
|        | 1     |                       |      | 1.8398 | 0.4608             | 0.1499          | 0.1502          | 0.1453 | 0.47                 | 0.15            | 0.15            | 0.15 |
|        | 2     | 0.43                  | 0.32 | 1.8492 | 0.4652             | 0.1479          | 0.1503          | 0.1509 | 0.47                 | 0.15            | 0.15            | 0.15 |
|        | 3     |                       |      | 1.8643 | 0.4675             | 0.1520          | 0.1505          | 0.1397 | 0.47                 | 0.15            | 0.15            | 0.14 |
|        | 4     |                       |      | 1.8444 | 0.4647             | 0.1487          | 0.1503          | 0.1462 | 0.47                 | 0.15            | 0.15            | 0.15 |
| M3     | 0     |                       |      | 1.8742 | 0.2176             | 0.0742          | 0.0722          | 0.0899 | 0.22                 | 0.07            | 0.07            | 0.09 |
|        | 1     |                       |      | 1.8689 | 0.2214             | 0.0755          | 0.0750          | 0.0912 | 0.22                 | 0.08            | 0.08            | 0.09 |
|        | 2     | 0.20                  | 0.19 | 1.8778 | 0.2229             | 0.0716          | 0.0742          | 0.0850 | 0.22                 | 0.07            | 0.07            | 0.08 |
|        | 3     |                       |      | 1.8783 | 0.2230             | 0.0705          | 0.0710          | 0.0856 | 0.22                 | 0.07            | 0.07            | 0.09 |
|        | 4     |                       |      | 1.8595 | 0.2213             | 0.0712          | 0.0698          | 0.0910 | 0.22                 | 0.07            | 0.07            | 0.09 |



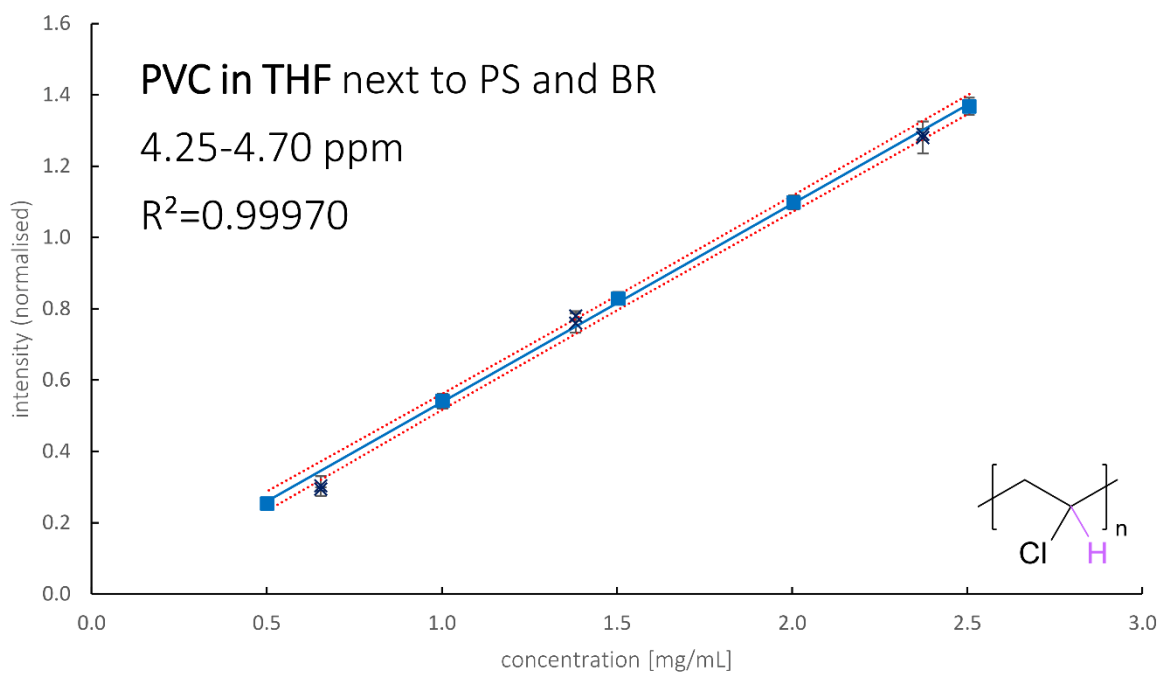

Figure S5: Calibration graph (—) of PVC in THF at 2.5-0.5 mg/mL. Additionally, the confidence interval (.....) and data points for the calibration samples (■), that were used for the linear regression as well as model samples (x), which allow subsequent method validation are depicted.

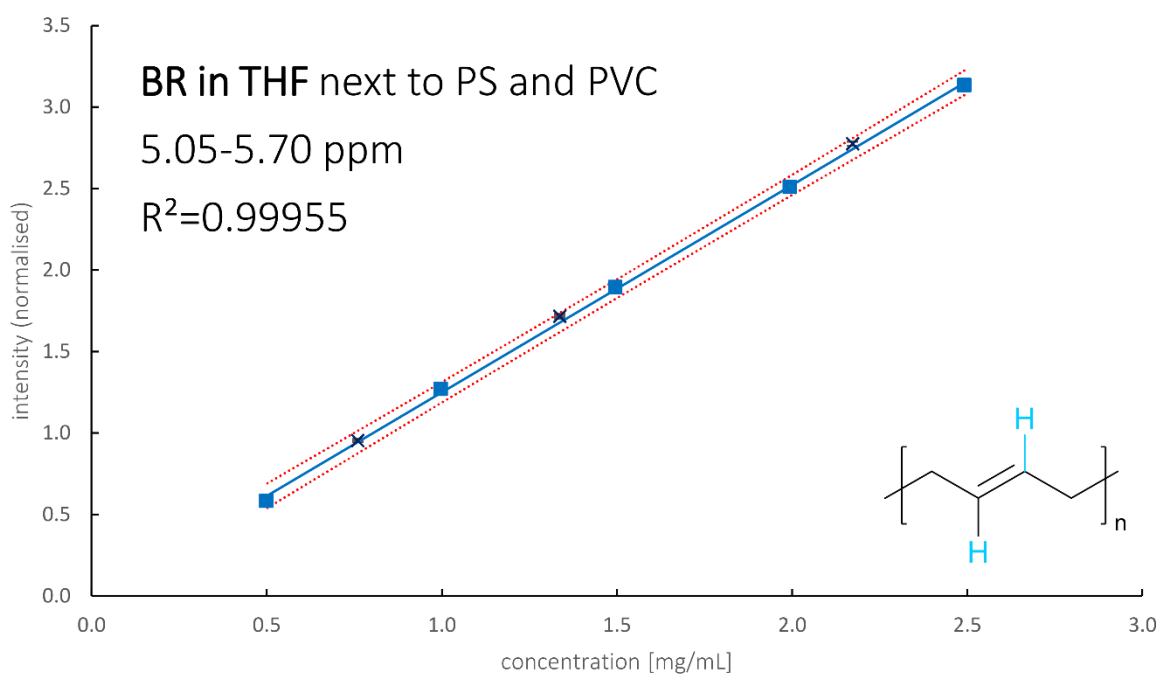

Figure S6: Calibration graph (—) of BR in THF at 2.5-0.5 mg/mL. Additionally, the confidence interval (.....) and data points for the calibration samples (■), that were used for the linear regression as well as model samples (x), which allow subsequent method validation are depicted.

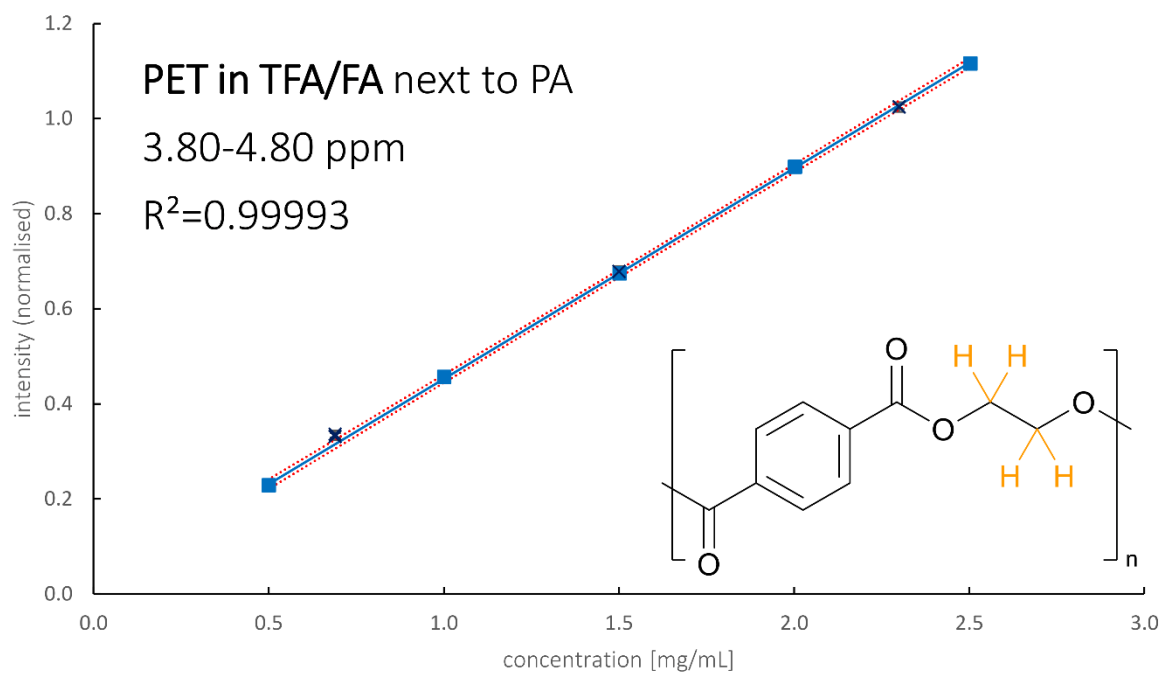

Figure S7: Calibration graph (—) of PET in TFA/FA at 2.5-0.5 mg/mL. Additionally, the confidence interval (.....) and data points for the calibration samples (■), that were used for the linear regression as well as model samples (x), which allow subsequent method validation are depicted.

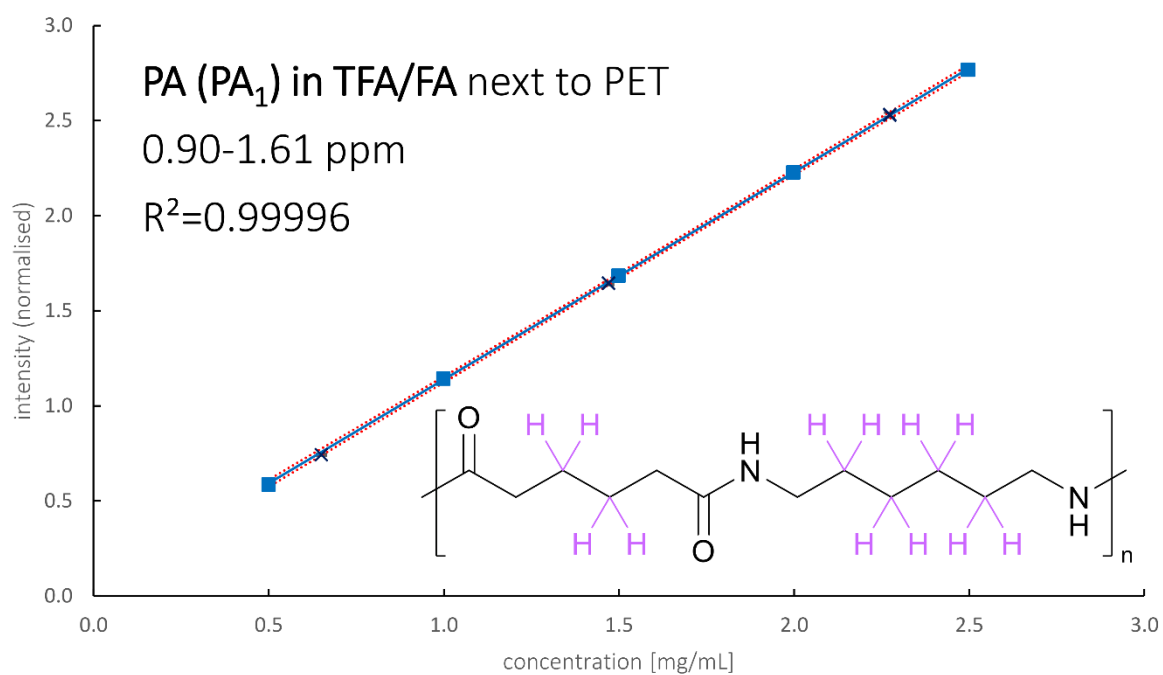

Figure S8: Calibration graph (—) of PA<sub>1</sub> in TFA/FA at 2.5-0.5 mg/mL. Additionally, the confidence interval (.....) and data points for the calibration samples (■), that were used for the linear regression as well as model samples (x), which allow subsequent method validation are depicted.

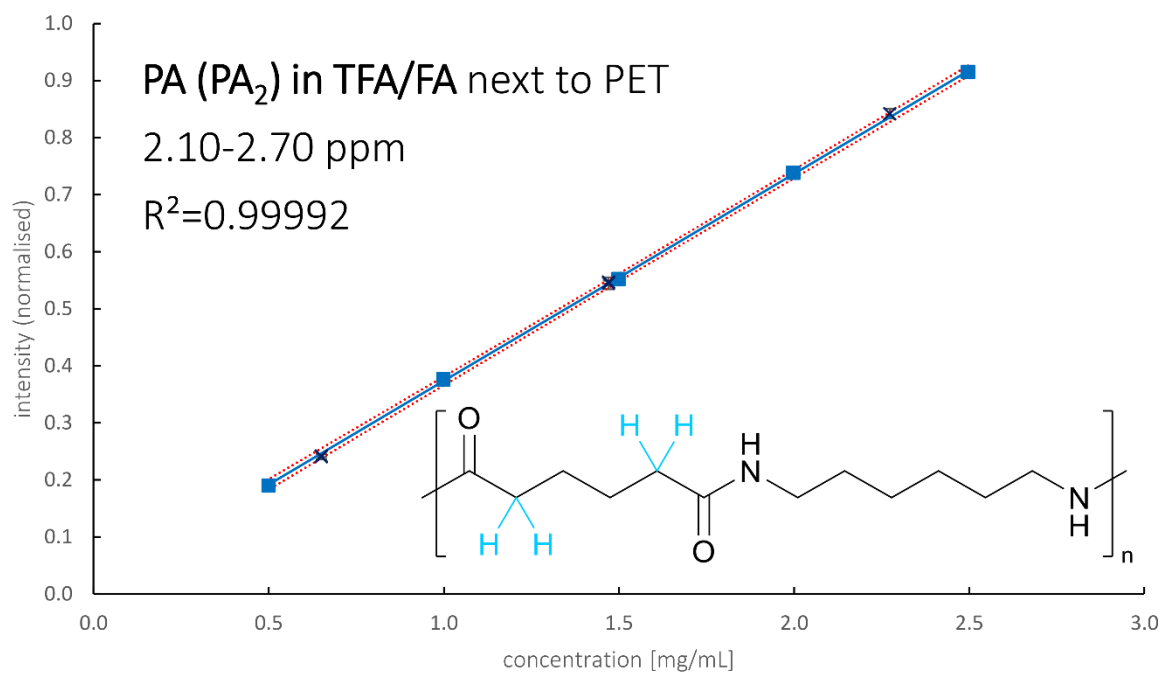

Figure S9: Calibration graph (—) of PA<sub>2</sub> in TFA/FA at 2.5-0.5 mg/mL. Additionally, the confidence interval (.....) and data points for the calibration samples (■), that were used for the linear regression as well as model samples (x), which allow subsequent method validation are depicted.

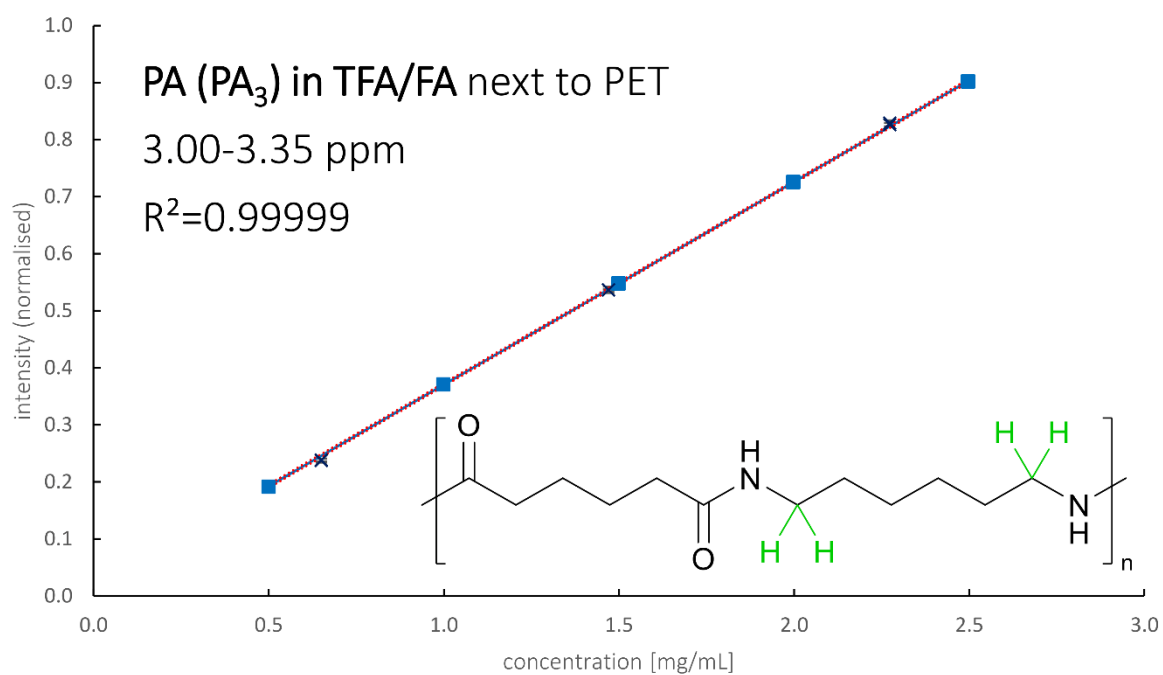

Figure S10: Calibration graph (—) of PA<sub>3</sub> in TFA/FA at 2.5-0.5 mg/mL. Additionally, the confidence interval (.....) and data points for the calibration samples (■), that were used for the linear regression as well as model samples (x), which allow subsequent method validation are depicted.

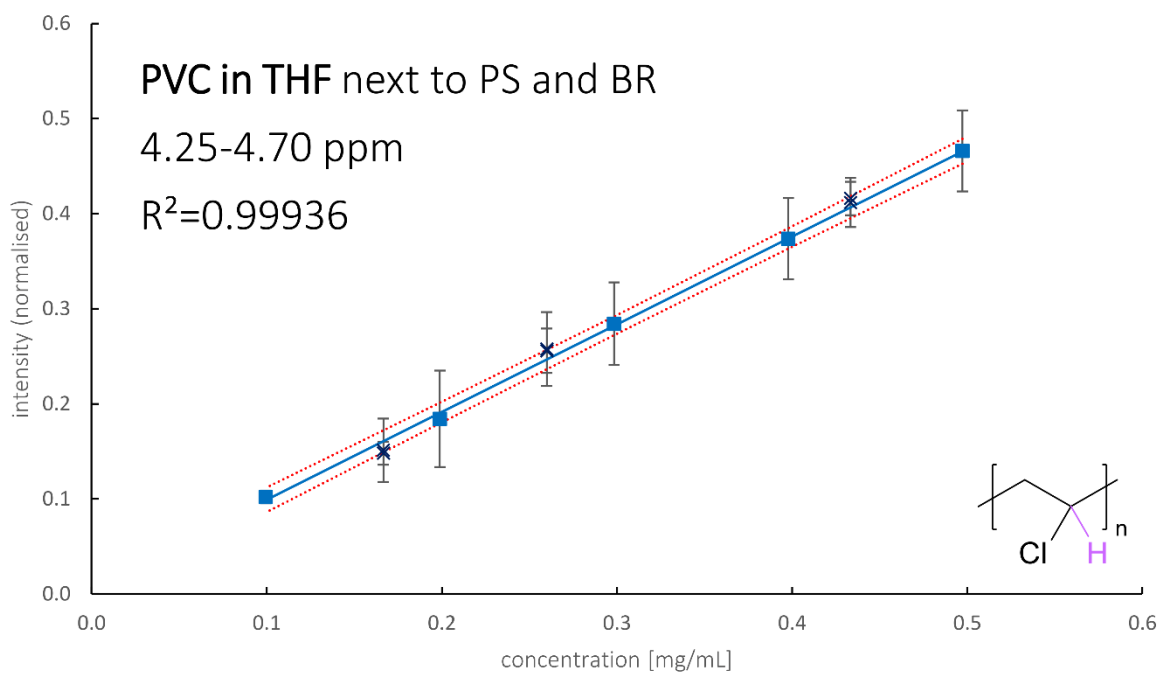

Figure S11: Calibration graph (—) of PVC in THF at 0.5-0.1 mg/mL. Additionally, the confidence interval (.....) and data points for the calibration samples (■), that were used for the linear regression as well as model samples (x), which allow subsequent method validation are depicted.

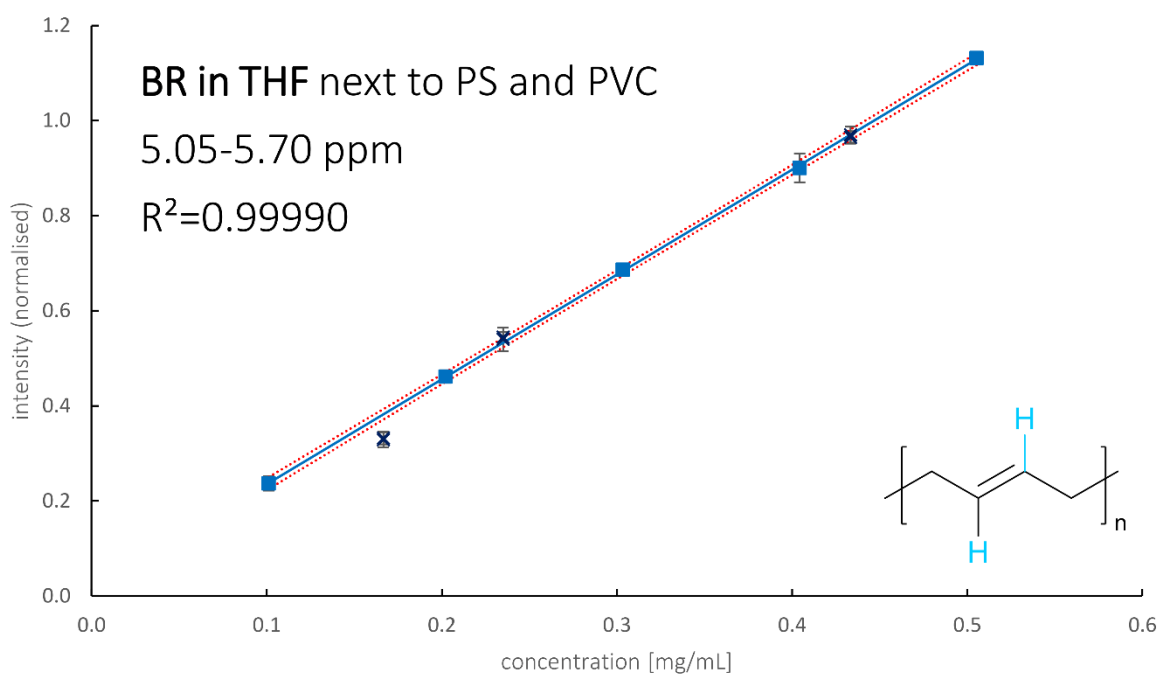

Figure S12: Calibration graph (—) of BR in THF at 0.5-0.1 mg/mL. Additionally, the confidence interval (.....) and data points for the calibration samples (■), that were used for the linear regression as well as model samples (x), which allow subsequent method validation are depicted.

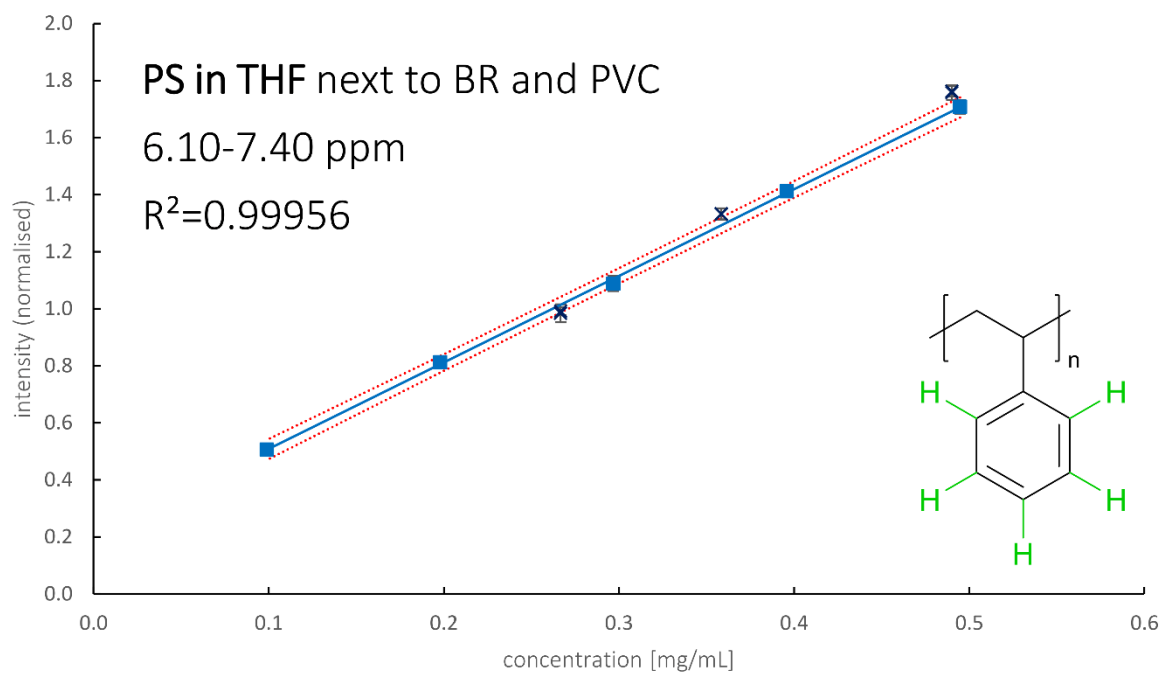

Figure S13: Calibration graph (—) of PS in THF at 0.5-0.1 mg/mL. Additionally, the confidence interval (.....) and data points for the calibration samples (■), that were used for the linear regression as well as model samples (x), which allow subsequent method validation are depicted.

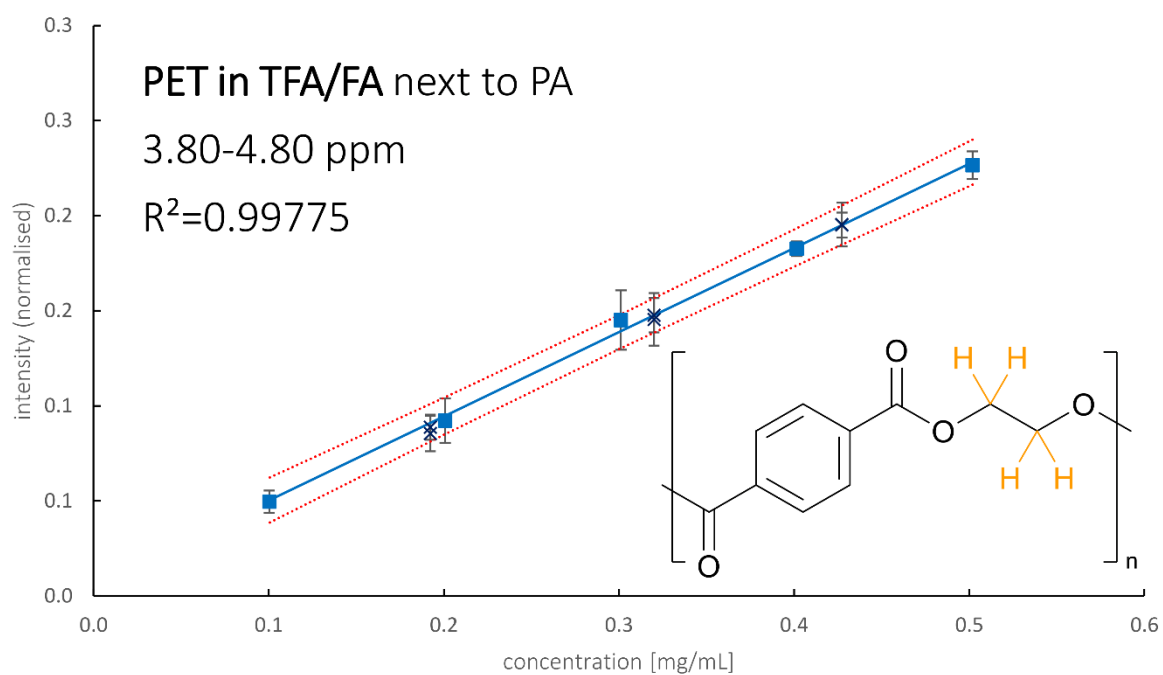

Figure S14: Calibration graph (—) of PET in TFA/FA at 0.5-0.1 mg/mL. Additionally, the confidence interval (.....) and data points for the calibration samples (■), that were used for the linear regression as well as model samples (x), which allow subsequent method validation are depicted.

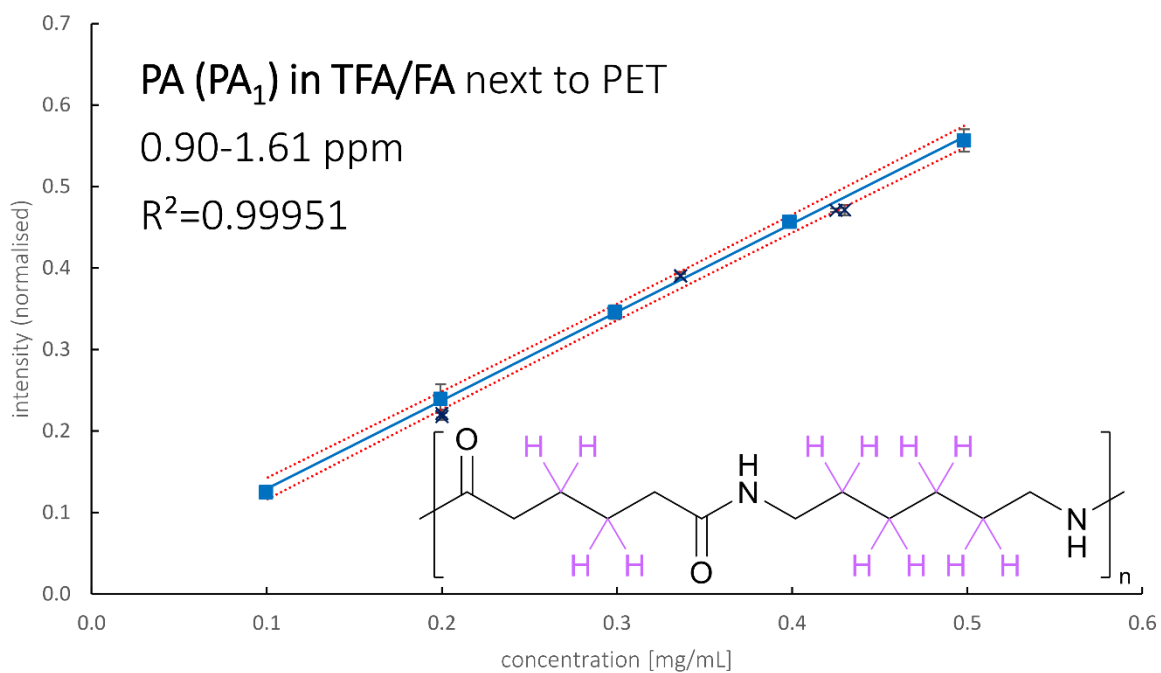

Figure S15: Calibration graph (—) of PA<sub>1</sub> in TFA/FA at 0.5-0.1 mg/mL. Additionally, the confidence interval (.....) and data points for the calibration samples (■), that were used for the linear regression as well as model samples (x), which allow subsequent method validation are depicted.

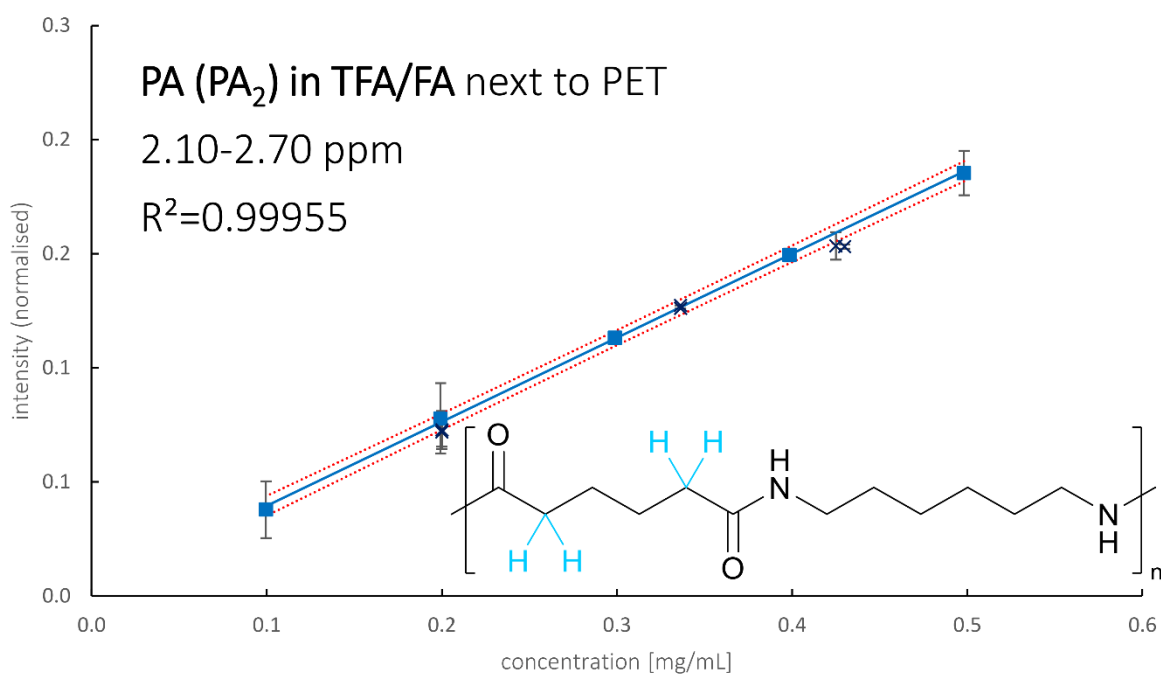

Figure S16: Calibration graph (—) of PA<sub>2</sub> in TFA/FA at 0.5-0.1 mg/mL. Additionally, the confidence interval (.....) and data points for the calibration samples (■), that were used for the linear regression as well as model samples (x), which allow subsequent method validation are depicted.

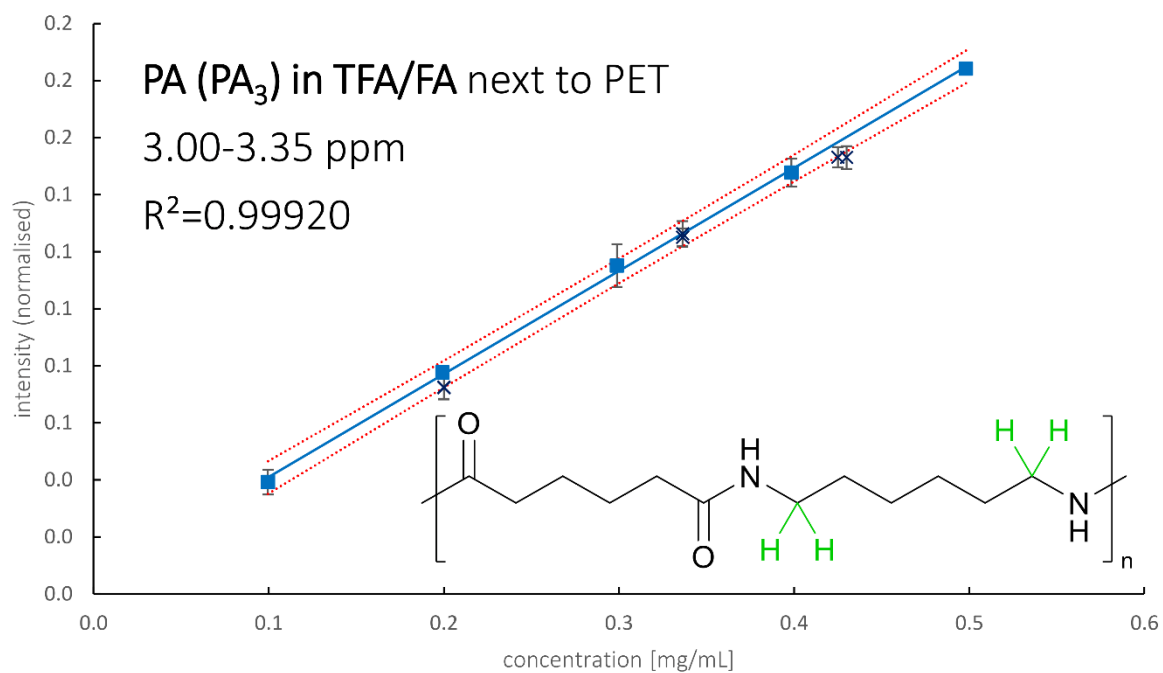

Figure S17: Calibration graph (—) of PA<sub>3</sub> in TFA/FA at 0.5-0.1 mg/mL. Additionally, the confidence interval (.....) and data points for the calibration samples (■), that were used for the linear regression as well as model samples (x), which allow subsequent method validation are depicted.

Table S13: Intensities of styrene- and butadiene-units of SBR model samples within the range of 3.2-2.3 mg/mL measured by <sup>1</sup>H-NMR in non-deuterated THF using HMDSO as INST (0.1%). Each sample is measured five times distributed over five hours.

| Sample | count | INST    | Absolute Intensity |                | Normalised Intensity |                |
|--------|-------|---------|--------------------|----------------|----------------------|----------------|
|        |       |         | Styrene-Unit       | Butadiene-Unit | Styrene-Unit         | Butadiene-Unit |
| SBR1   | 1     | 14.1160 | 5.2480             | 13.9186        | 1.10                 | 2.92           |
|        | 2     | 4.7824  | 1.7775             | 4.6991         | 1.10                 | 2.91           |
|        | 3     | 14.2683 | 5.3223             | 14.1598        | 1.10                 | 2.93           |
|        | 4     | 14.3163 | 5.2713             | 14.0959        | 1.09                 | 2.91           |
|        | 5     | 4.8009  | 1.8080             | 4.7309         | 1.11                 | 2.91           |
| SBR2   | 1     | 14.0359 | 4.7359             | 12.5453        | 1.00                 | 2.64           |
|        | 2     | 14.2379 | 4.8215             | 12.6085        | 1.00                 | 2.62           |
|        | 3     | 4.7953  | 1.6198             | 4.2783         | 1.00                 | 2.64           |
|        | 4     | 14.2459 | 4.8358             | 12.6263        | 1.00                 | 2.62           |
|        | 5     | 4.8973  | 1.6723             | 4.3535         | 1.01                 | 2.63           |
| SBR3   | 1     | 4.8714  | 1.5418             | 3.9701         | 0.94                 | 2.41           |
|        | 2     | 4.8585  | 1.5237             | 3.9721         | 0.93                 | 2.42           |
|        | 3     | 4.8596  | 1.5139             | 3.9585         | 0.92                 | 2.41           |
|        | 4     | 4.8693  | 1.5307             | 3.9403         | 0.93                 | 2.39           |
|        | 5     | 14.6531 | 4.6182             | 11.9492        | 0.93                 | 2.41           |
